# Supplementary material for: DLAT is a promising prognostic marker and therapeutic target for hepatocellular carcinoma: a comprehensive study based on public databases
Source: Springer Nature journal article supplement (doi:10.1038/s41598-023-43835-y), 2023-10-12
Supplement: MOESM1 [file 41598_2023_43835_MOESM1_ESM.pdf]

# **DLAT is a promising prognostic marker and therapeutic target for hepatocellular carcinoma: A comprehensive study based on public databases**

Peng Zhang<sup>1†</sup>, Jiang-hua Zhao<sup>2†</sup>, Liu-Xia Yuan<sup>3</sup>, Lin-Ling Ju<sup>3</sup>, Hui-Xuan Wang<sup>3</sup>, Feng Wang<sup>4</sup>, Lin Chen<sup>3\*</sup>, Wei-Hua Cai<sup>5\*</sup>

<sup>1</sup> Nantong Institute of Liver Disease, Department of Hepatobiliary Surgery, Nantong Third People's Hospital, Affiliated Nantong Hospital 3 of Nantong University, Nantong, China.

<sup>2</sup> Medical School of Nantong University, Nantong Third People's Hospital, Affiliated Nantong Hospital 3 of Nantong University, Nantong, China.

<sup>3</sup> Nantong Institute of Liver Disease, Nantong Third People's Hospital, Affiliated Nantong Hospital 3 of Nantong University, Nantong, China.

<sup>4</sup> Department of Laboratory Medicine, Affiliated Hospital of Nantong University, Medical School of Nantong University, Nantong, China.

<sup>5</sup> Department of Hepatobiliary Surgery, Nantong Third People's Hospital, Affiliated Nantong Hospital 3 of Nantong University, Nantong, China.

## **\* Correspondence:**

Lin Chen

[xiaobei227@sina.com](mailto:xiaobei227@sina.com)

Wei-Hua Cai

[cwhntsy@163.com](mailto:cwhntsy@163.com)

## DLAT Association Result

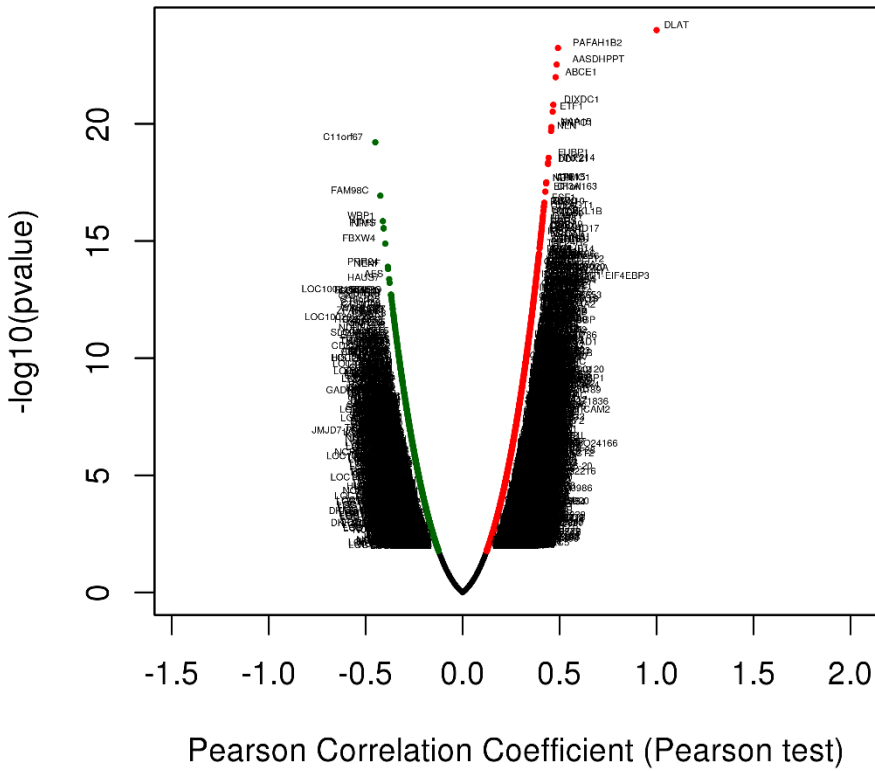

**Supplementary Figure 1** The heatmap from the LinkedOmic database showed the all genes correlated with DLAT.

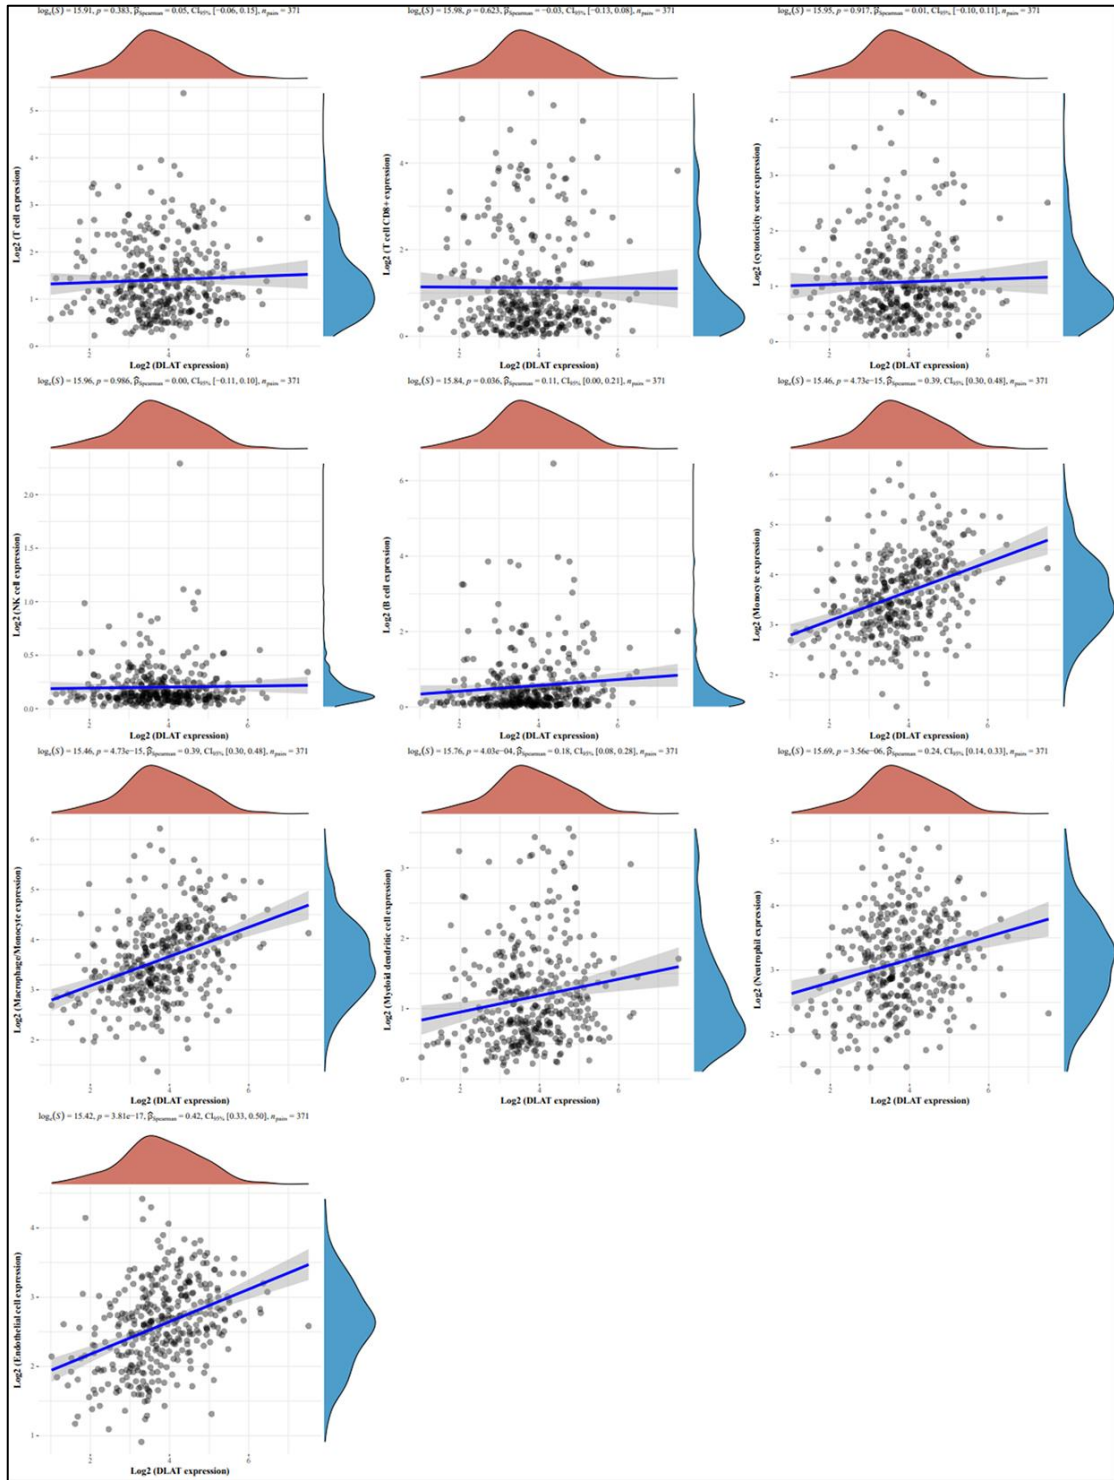

**Supplementary Figure 2** Correlation between DLAT and immune infiltration was analyzed by MCPOUNTER algorithm.

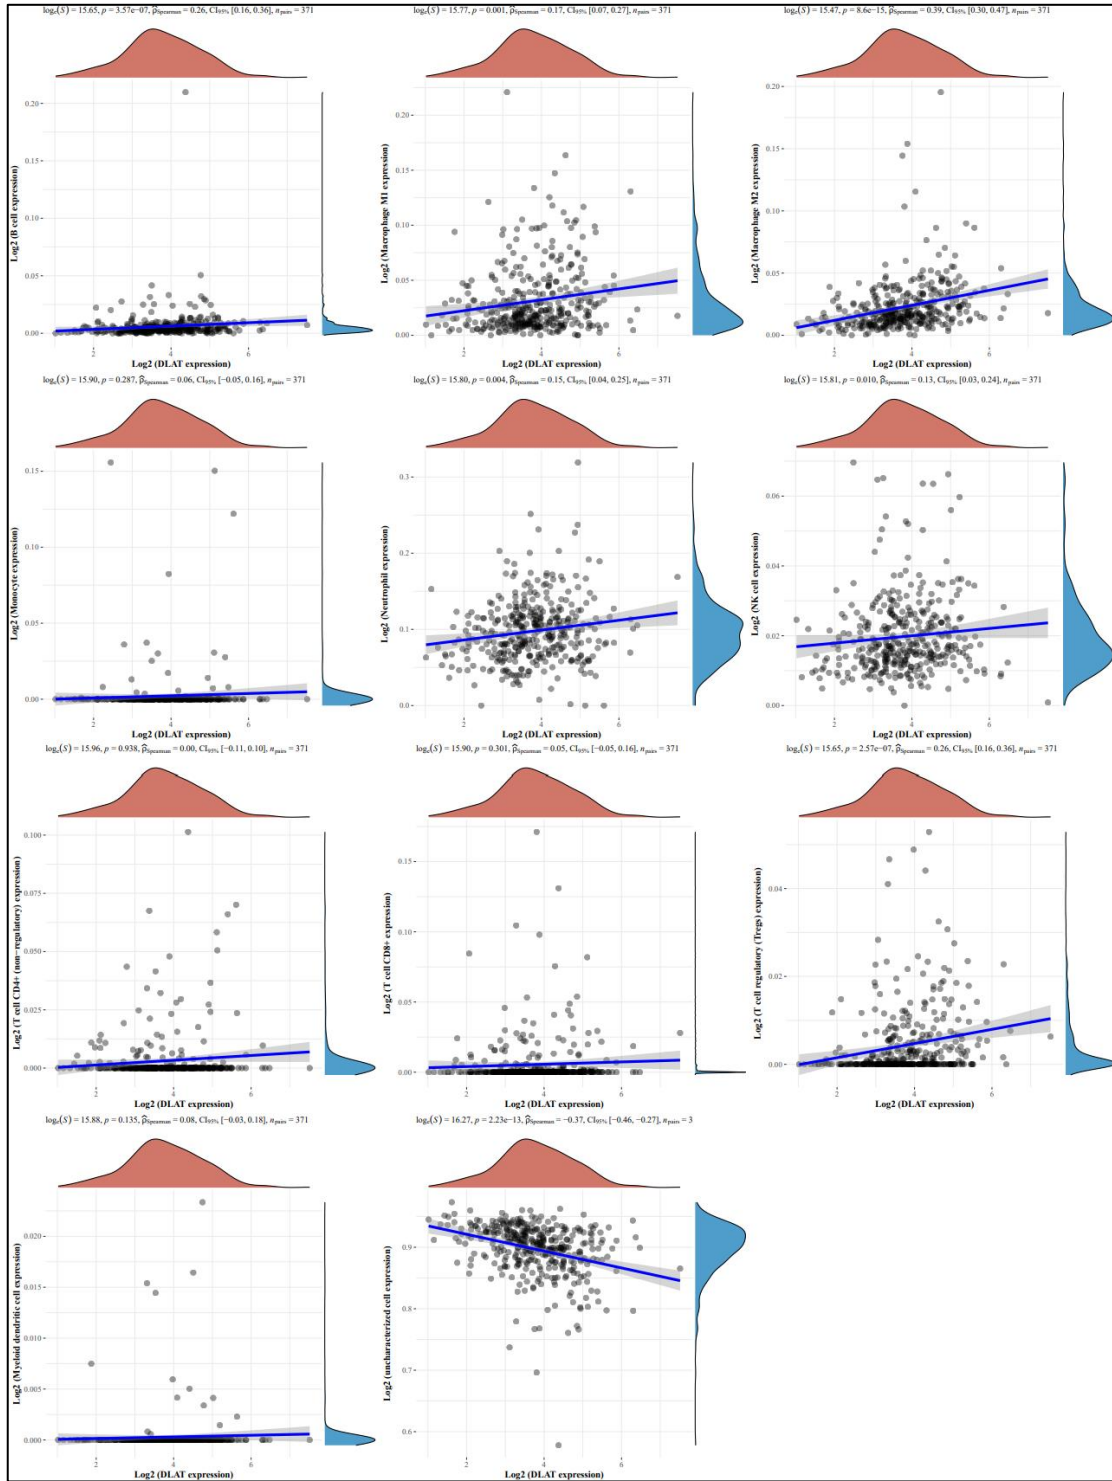

**Supplementary Figure 3** Correlation between DLAT and immune infiltration was analyzed by QUANTISEQ algorithm.

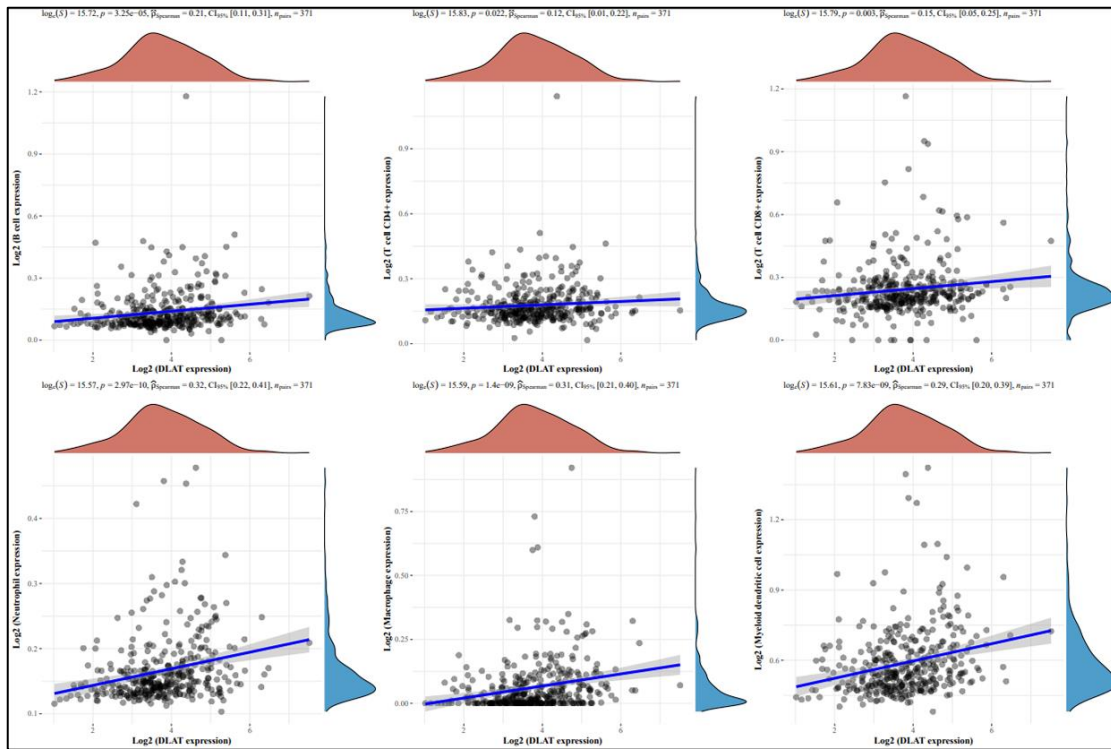

**Supplementary Figure 4** Correlation between DLAT and immune infiltration was analyzed by TIMER algorithm.

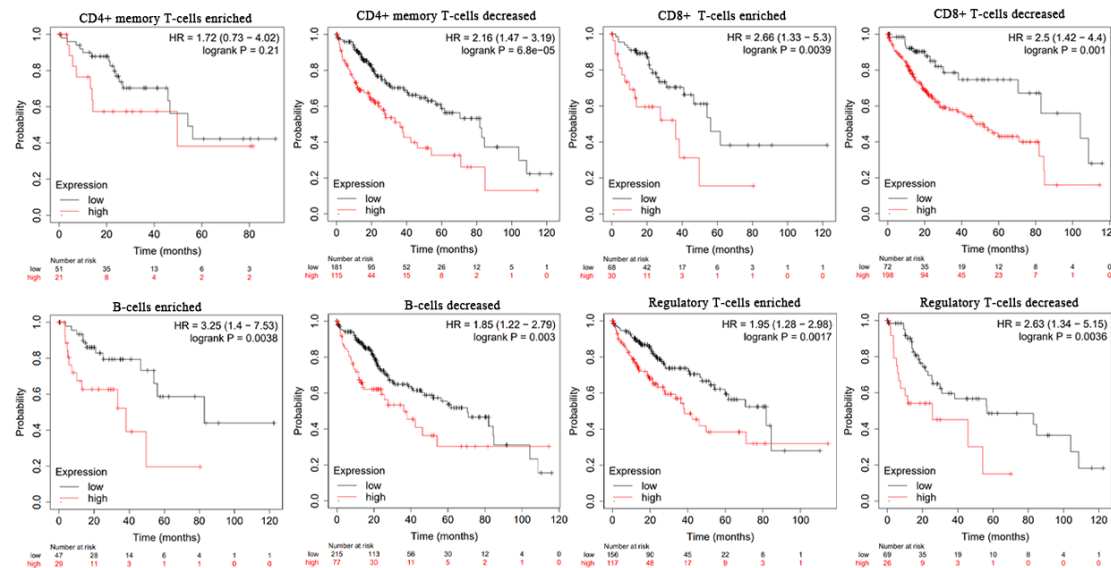

**Supplementary Figure 5** The impact of DLAT expression on the OS of HCC patients with enriched or decreased infiltration ratios.
